# Supplementary material for: Polyphenol Iongel Patches with Antimicrobial, Antioxidant and Anti-Inflammatory Properties
Source: MDPI journal article supplement (doi:10.3390/polym15051076), 2023-02-21
Supplement: s1 [file s1]

## Supporting Information

### **Polyphenol iongel patches with antimicrobial, antioxidant and anti-inflammatory properties**

Gisela C. Luque<sup>a\*</sup>, Melissa Moya<sup>b,c</sup>, Matias Picchio<sup>a</sup>, Vanessa Bagnarello<sup>b,e</sup>,  
Idalia Valerio<sup>b,c,d</sup>, José Bolaños<sup>b</sup>, María Vethencourt<sup>b</sup>, Sue Hellen Gamboa<sup>c,d</sup>,  
Liliana C. Tomé<sup>f</sup>, Roque J. Minari<sup>a,i\*</sup> and David Mecerreyes<sup>gh\*</sup>

<sup>a</sup>Instituto de Desarrollo Tecnológico para la Industria Química (INTEC), CONICET, Güemes 3450, Santa Fe 3000, Argentina.

<sup>b</sup>Laboratorio de Investigación, Universidad de Ciencias Médicas, San José, Costa Rica.

<sup>c</sup>Facultad de Microbiología, Universidad de Ciencias Médicas, San José, Costa Rica.

<sup>d</sup>Facultad de Medicina, Universidad de Ciencias Médicas, San José, Costa Rica.

<sup>e</sup>Escuela de Fisioterapia, Universidad de Ciencias Médicas, San José, Costa Rica.

<sup>f</sup> LAQV-REQUIMTE, Chemistry Department, NOVA School of Science and Technology, FCT NOVA, Universidade NOVA de Lisboa, 2829-516 Caparica, Portugal.

<sup>g</sup> Ikerbasque, Basque Foundation for Science, 48013 Bilbao, Spain.

<sup>h</sup> POLYMAT University of the Basque Country UPV/EHU, Joxe Mari Korta Center, Avda. Tolosa 72, 20018 Donostia-San Sebastian, Spain.

<sup>i</sup> Facultad de Ingeniería Química (Universidad Nacional del Litoral), Santiago del Estero 2829, Santa Fe 3000, Argentina.

\*Corresponding authors:

David Mecerreyes (E-mail: david.mecerreyes@ehu.es)

Roque J. Minari (E-mail: rjminari@santafe-conicet.gov.ar)

Gisela Luque (E-mail: luquegc@intec.unl.edu.ar)

**Table S1.** Pictures of polyphenol iongels

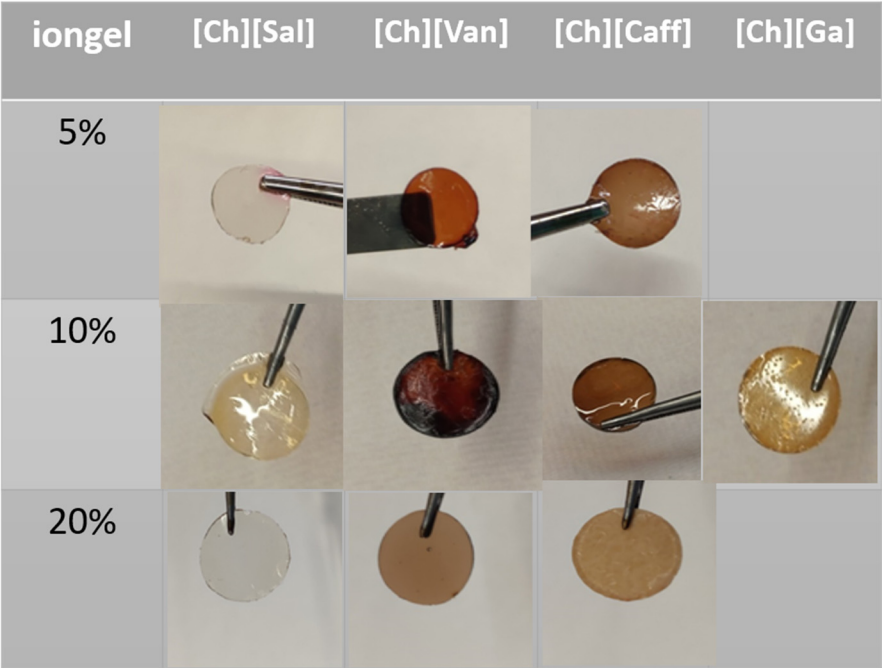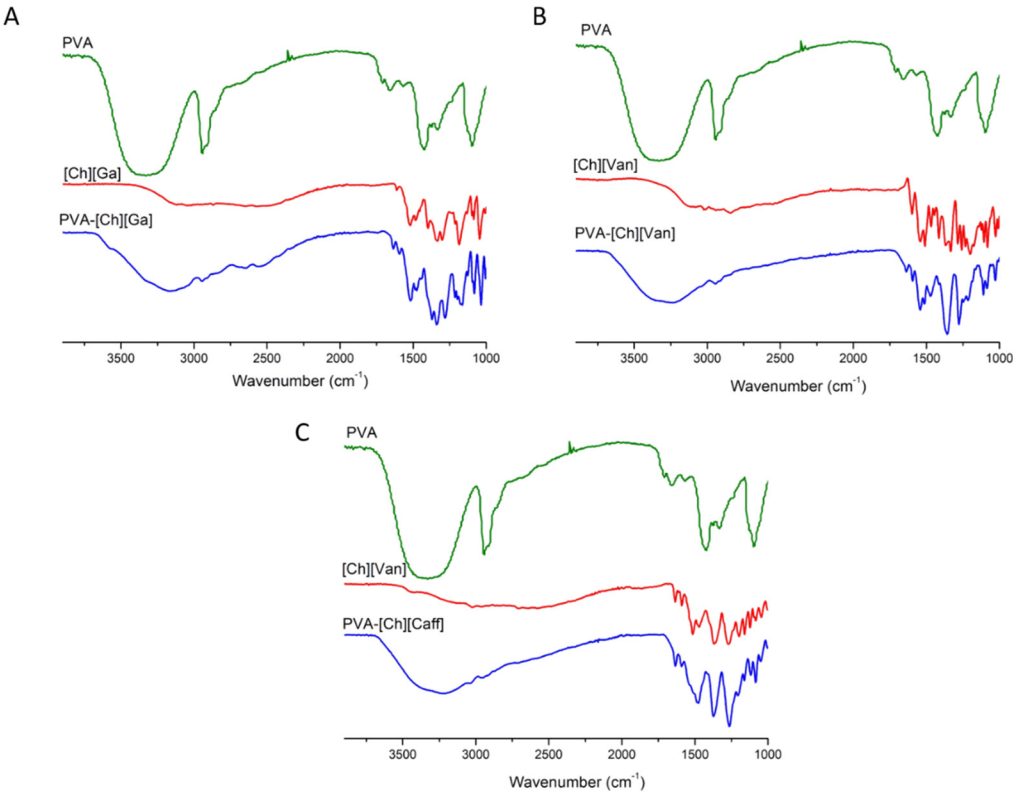

**Figure S1.** FTIR spectra of neat PVA, ILs, and polyphenol iongels.

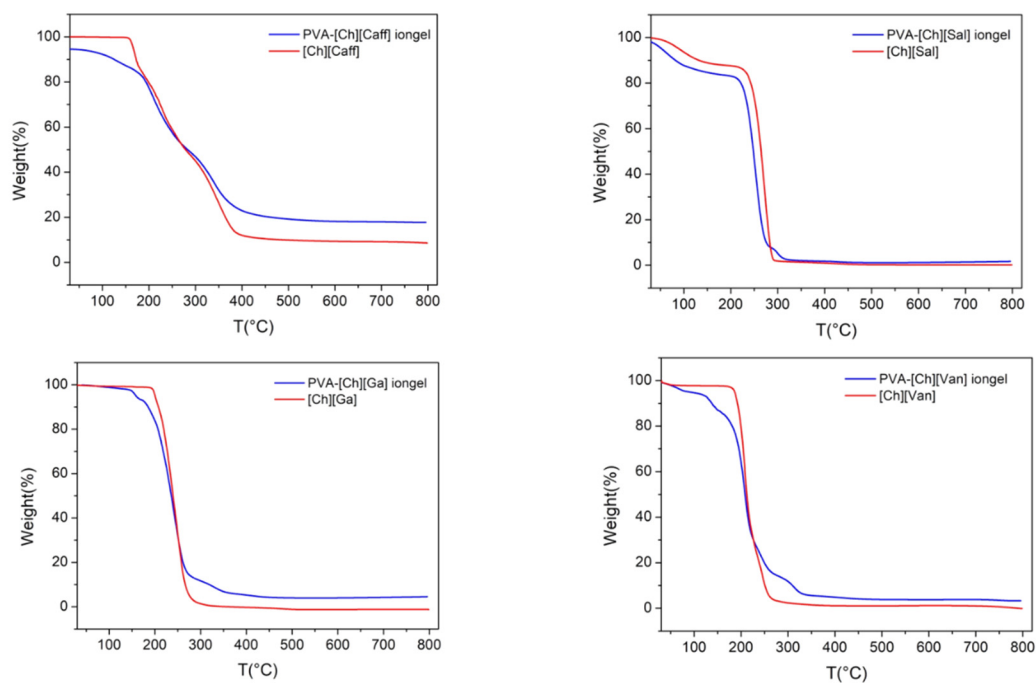

**Figure S2.** TGA analysis of polyphenol iongels with 10% of polymer concentration and the corresponding ILs.

**Table S2**  $T_{\text{max}}$  and  $T_{50\%}$  of the polyphenol iongels

| iongel         | $T_{\text{max}} (^{\circ}\text{C})$ | $T_{50\%} (^{\circ}\text{C})$ |
|----------------|-------------------------------------|-------------------------------|
| PVA-[Ch][Ga]   | 242                                 | 241                           |
| PVA-[Ch][Van]  | 206                                 | 208                           |
| PVA-[Ch][Sal]  | 251                                 | 248                           |
| PVA-[Ch][Caff] | 226                                 | 275                           |

**Table S3.** Gel to sol transition temperatures of the polyphenol iongels.

| iongel         | Transition temperatures (°C)<br>$T_{\text{gel-sol}}$ |
|----------------|------------------------------------------------------|
| PVA-[Ch][Ga]   | 123                                                  |
| PVA-[Ch][Van]  | 78                                                   |
| PVA-[Ch][Sal]  | 120                                                  |
| PVA-[Ch][Caff] | 79                                                   |

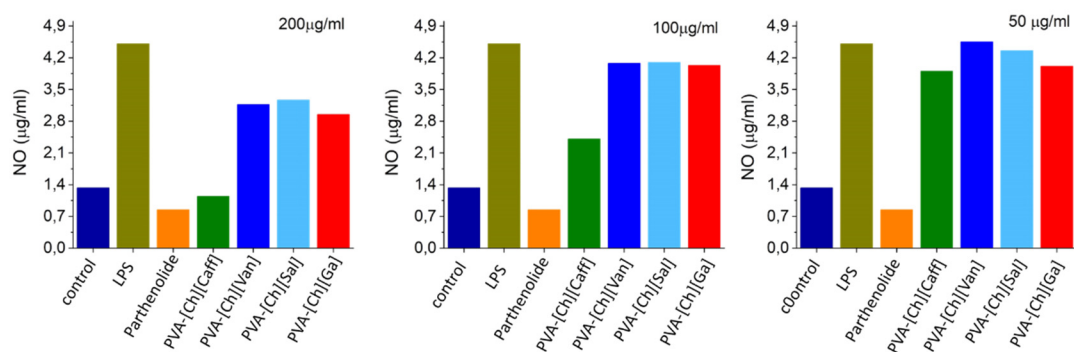

**Figure S3.** Evaluation of the capacity of iongels to prevent LPS-induced NO production in murine peritoneal macrophages different concentrations of each iongel reported NO (µg/ml)
